# Supplementary material for: Synthesis and structure of a bis-N-heterocyclic carbene complex of uranium tetrachloride exhibiting short Cl⋯Ccarbene contacts
Source: Royal Society of Chemistry journal article supplement (doi:10.1039/b906000f), 2009-01-01
Supplement: b906000f.pdf [file b906000f.pdf]

- *Supplementary Information* -

**Synthesis and Structure of a bis-N-Heterocyclic Carbene Complex of Uranium  
Tetrachloride Exhibiting Short Cl...C<sub>carbene</sub> Contacts**

Benedict M. Gardner Jonathan McMaster and Stephen T. Liddle\*

School of Chemistry, University of Nottingham, University Park, Nottingham, NG7

2RD UK. Fax: 44 115 951 3563; Tel: 44 115 846 7167;

\*e-mail: [stephen.liddle@nottingham.ac.uk](mailto:stephen.liddle@nottingham.ac.uk)

**Coordinates and energy for 1a:**

|      |           |           |           |
|------|-----------|-----------|-----------|
| 1.H  | -1.435651 | 0.031194  | -5.917734 |
| 2.H  | -3.945575 | 0.423457  | -5.446200 |
| 3.H  | -1.318589 | 2.101261  | -5.344617 |
| 4.H  | -1.394919 | -1.526393 | -5.073221 |
| 5.H  | 3.312868  | -0.830301 | -5.001620 |
| 6.H  | -3.914209 | -1.258693 | -4.859552 |
| 7.C  | -1.320348 | -0.439663 | -4.929539 |
| 8.H  | -1.079809 | 4.469771  | -4.677845 |
| 9.C  | -3.803083 | -0.207039 | -4.554769 |
| 10.H | 3.068680  | 0.853547  | -4.495977 |
| 11.H | -0.315435 | -0.219451 | -4.549025 |
| 12.C | -1.669206 | 2.420179  | -4.363544 |
| 13.C | 2.994627  | -0.191696 | -4.163683 |
| 14.H | 3.722725  | -2.806972 | -4.181358 |
| 15.H | 5.701107  | -0.926767 | -4.005285 |
| 16.C | -1.533437 | 3.755280  | -3.989299 |
| 17.H | 1.942231  | -0.403845 | -3.939665 |
| 18.H | -4.606647 | 0.023530  | -3.842254 |
| 19.C | -2.404154 | 0.024151  | -3.944980 |
| 20.H | 5.500350  | 0.817114  | -3.705599 |
| 21.C | -2.231529 | 1.473810  | -3.496325 |
| 22.C | 5.358147  | -0.183223 | -3.269203 |
| 23.H | 3.375976  | -5.058682 | -3.214435 |

|       |           |           |           |
|-------|-----------|-----------|-----------|
| 24.C  | 3.610794  | -2.918765 | -3.102208 |
| 25.H  | -5.010739 | -3.625140 | -2.775571 |
| 26.H  | -2.310178 | -0.610659 | -3.053203 |
| 27.C  | 3.872647  | -0.406309 | -2.918743 |
| 28.C  | -1.969171 | 4.176988  | -2.736932 |
| 29.H  | -2.612541 | -4.469696 | -2.734919 |
| 30.C  | 3.414241  | -4.185787 | -2.560964 |
| 31.H  | -1.857209 | 5.224200  | -2.454226 |
| 32.H  | 6.007178  | -0.261745 | -2.385881 |
| 33.C  | 3.650244  | -1.777257 | -2.287390 |
| 34.H  | 3.573744  | 0.353420  | -2.184380 |
| 35.C  | -2.645769 | 1.928929  | -2.223413 |
| 36.C  | -5.003978 | -3.496411 | -1.682658 |
| 37.C  | -2.541403 | 3.277802  | -1.823983 |
| 38.H  | -5.322873 | 1.523259  | -1.762237 |
| 39.C  | -2.673707 | -4.463605 | -1.637299 |
| 40.H  | -5.649144 | -2.641011 | -1.440045 |
| 41.Cl | -0.018888 | -1.995240 | -1.786131 |
| 42.Cl | 0.883746  | 1.559200  | -1.760270 |
| 43.H  | -5.449185 | -4.396156 | -1.230519 |
| 44.H  | -3.087977 | -5.435085 | -1.328427 |
| 45.H  | -4.333783 | 5.365079  | -1.311806 |
| 46.H  | -3.157993 | -2.385108 | -1.644057 |
| 47.H  | 2.391630  | 4.748615  | -1.426527 |
| 48.C  | 3.255814  | -4.339423 | -1.185374 |
| 49.C  | -3.559550 | -3.294468 | -1.177215 |
| 50.C  | -4.654093 | 0.875088  | -1.211393 |
| 51.N  | -3.270586 | 0.976838  | -1.317075 |
| 52.H  | -1.654021 | -4.369423 | -1.244837 |
| 53.H  | -5.177712 | 3.816478  | -1.110917 |
| 54.H  | 3.091103  | -5.334832 | -0.773392 |
| 55.H  | 4.822064  | 4.537544  | -0.735116 |
| 56.C  | 3.488326  | -1.965252 | -0.898962 |
| 57.C  | -4.429187 | 4.482780  | -0.660234 |
| 58.C  | -3.061157 | 3.789889  | -0.483665 |
| 59.H  | -1.954711 | 5.683508  | -0.343763 |
| 60.C  | 2.113391  | 4.588551  | -0.375067 |
| 61.C  | -2.631516 | 0.043583  | -0.533129 |
| 62.C  | -4.905483 | -0.141377 | -0.347183 |
| 63.C  | 3.297204  | -3.238626 | -0.318329 |
| 64.H  | 3.150011  | 2.725134  | -0.327556 |
| 65.H  | 1.101442  | 4.167575  | -0.358989 |
| 66.H  | -5.837739 | -0.556905 | 0.012466  |
| 67.H  | 2.098039  | 5.572477  | 0.117719  |
| 68.H  | 5.791401  | -0.847509 | 0.041614  |
| 69.H  | -4.815718 | 4.819684  | 0.313380  |
| 70.C  | 4.526532  | 4.267144  | 0.290034  |
| 71.N  | 3.622933  | -0.811044 | -0.020419 |
| 72.H  | -3.193947 | 2.923952  | 0.178493  |
| 73.N  | -3.670093 | -0.641937 | 0.052584  |

|        |           |           |           |
|--------|-----------|-----------|-----------|
| 74.U   | -0.009192 | -0.125587 | -0.007729 |
| 75.C   | -2.078875 | 4.744115  | 0.215379  |
| 76.C   | 3.120282  | 3.633475  | 0.288534  |
| 77.C   | -3.536081 | -3.084589 | 0.334574  |
| 78.C   | 4.880623  | -0.368598 | 0.377161  |
| 79.H   | 5.288115  | 3.585116  | 0.692969  |
| 80.H   | -1.096922 | 4.275072  | 0.345871  |
| 81.H   | 4.539859  | 5.183832  | 0.899762  |
| 82.H   | -3.466061 | -5.193918 | 0.774917  |
| 83.C   | 2.617543  | -0.051824 | 0.532671  |
| 84.C   | -3.579777 | -1.802914 | 0.926649  |
| 85.H   | -2.462071 | 5.003176  | 1.212981  |
| 86.C   | -3.516677 | -4.190199 | 1.196968  |
| 87.H   | 1.245153  | -4.471463 | 1.062710  |
| 88.H   | 2.632538  | -5.573308 | 1.307025  |
| 89.C   | 4.678300  | 0.688797  | 1.204108  |
| 90.C   | 3.175502  | -3.446747 | 1.188600  |
| 91.H   | 5.024568  | -4.595489 | 1.414889  |
| 92.N   | 3.301980  | 0.869777  | 1.291848  |
| 93.H   | 5.375930  | 1.319486  | 1.739469  |
| 94.C   | 2.214979  | -4.587357 | 1.561593  |
| 95.H   | 5.242950  | -2.846220 | 1.661832  |
| 96.H   | 2.755131  | -2.526671 | 1.615868  |
| 97.C   | 2.694151  | 3.226829  | 1.696219  |
| 98.C   | 4.558036  | -3.688594 | 1.829858  |
| 99.Cl  | -0.738986 | 1.731445  | 1.633962  |
| 100.Cl | -0.048677 | -1.853361 | 1.921381  |
| 101.H  | 2.174591  | 5.242994  | 2.260246  |
| 102.C  | 2.747031  | 1.897004  | 2.162545  |
| 103.H  | -5.789614 | 0.180068  | 2.420817  |
| 104.C  | -3.624518 | -1.607814 | 2.322654  |
| 105.H  | -3.306673 | 0.499376  | 2.225365  |
| 106.C  | -3.557980 | -4.029153 | 2.580184  |
| 107.H  | 2.036329  | -4.577318 | 2.645904  |
| 108.C  | 2.238890  | 4.206202  | 2.592430  |
| 109.H  | 4.452904  | -3.825954 | 2.916707  |
| 110.H  | -3.537852 | -4.904500 | 3.230973  |
| 111.C  | -3.690162 | -0.222727 | 2.958849  |
| 112.C  | -3.614656 | -2.752746 | 3.132920  |
| 113.C  | -5.140721 | 0.169018  | 3.307453  |
| 114.H  | 2.313016  | -0.568352 | 3.116667  |
| 115.H  | -5.164680 | 1.173854  | 3.755856  |
| 116.C  | 2.368625  | 1.531742  | 3.473602  |
| 117.H  | 4.648302  | -0.060190 | 3.877713  |
| 118.H  | -5.571444 | -0.538116 | 4.033224  |
| 119.C  | 1.856716  | 3.877227  | 3.889340  |
| 120.H  | -3.633677 | -2.638117 | 4.216804  |
| 121.C  | 2.452258  | 0.094671  | 3.981339  |
| 122.H  | -1.780350 | -0.463134 | 3.988581  |
| 123.C  | -2.795582 | -0.107706 | 4.204226  |

|       |           |           |          |
|-------|-----------|-----------|----------|
| 124.C | 1.919291  | 2.553906  | 4.320618 |
| 125.H | 1.498329  | 4.654009  | 4.566245 |
| 126.C | 3.833579  | -0.204333 | 4.600209 |
| 127.H | -2.732511 | 0.942854  | 4.520186 |
| 128.H | 0.354908  | 0.033948  | 4.597814 |
| 129.H | 3.873717  | -1.247097 | 4.949748 |
| 130.H | -3.197491 | -0.684554 | 5.051115 |
| 131.C | 1.340846  | -0.251841 | 4.983988 |
| 132.H | 1.331716  | -1.335635 | 5.164361 |
| 133.H | 4.021881  | 0.452704  | 5.463480 |
| 134.H | 1.602377  | 2.305509  | 5.333162 |
| 135.H | 1.495775  | 0.242650  | 5.955014 |

**Energy:** -794.82352869 eV
